# Supplementary material for: Thyroid Hormone Replacement Therapy Is Associated with Longer Overall Survival in Patients with Resectable Gastroesophageal Cancer: A Retrospective Single-Center Analysis
Source: MDPI journal article supplement (doi:10.3390/cancers13205050), 2021-10-09
Supplement: s1 [file s1]

**Supplementary Figure S1:** Tumor location and histological subtype.  
GEJ=gastroesophageal junction

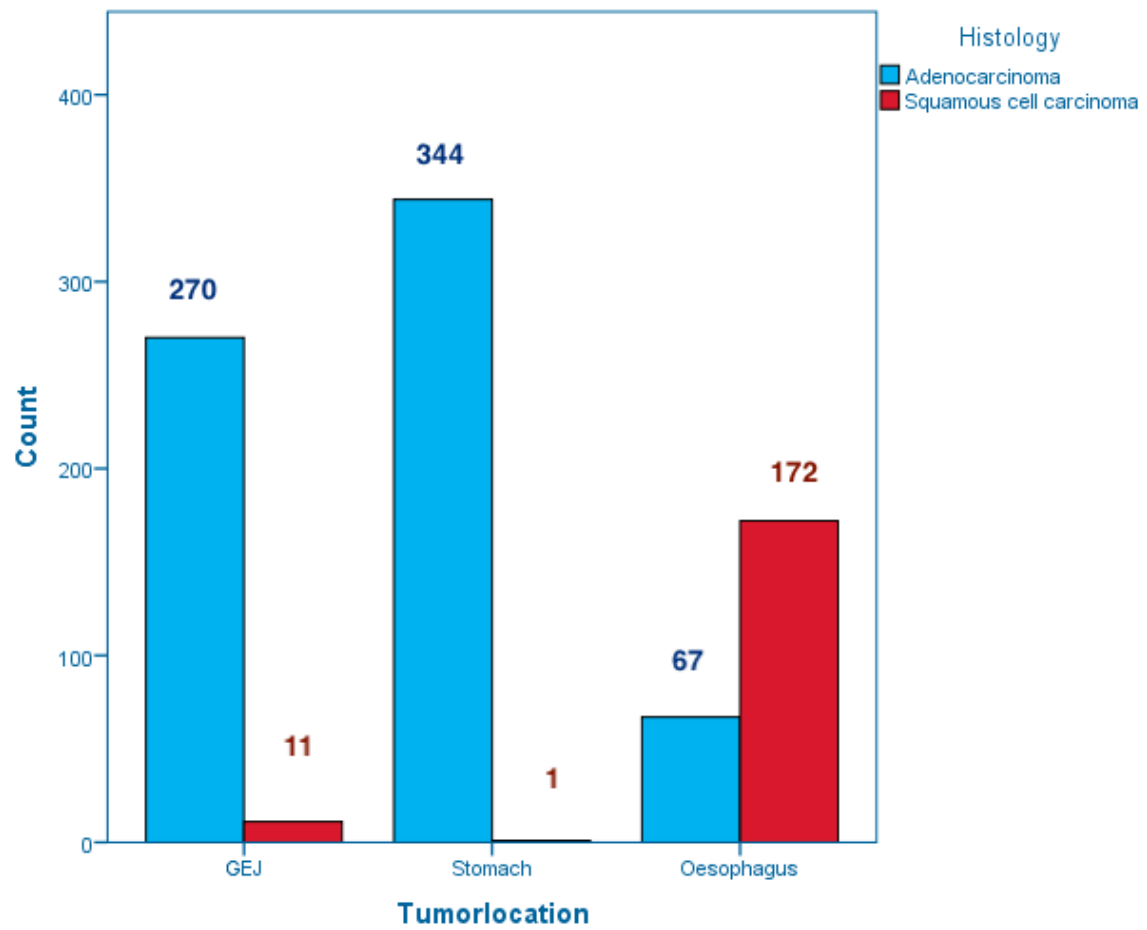

**Supplementary Figure S2: Kaplan Meier curves of demographic and cancer specific characteristics**

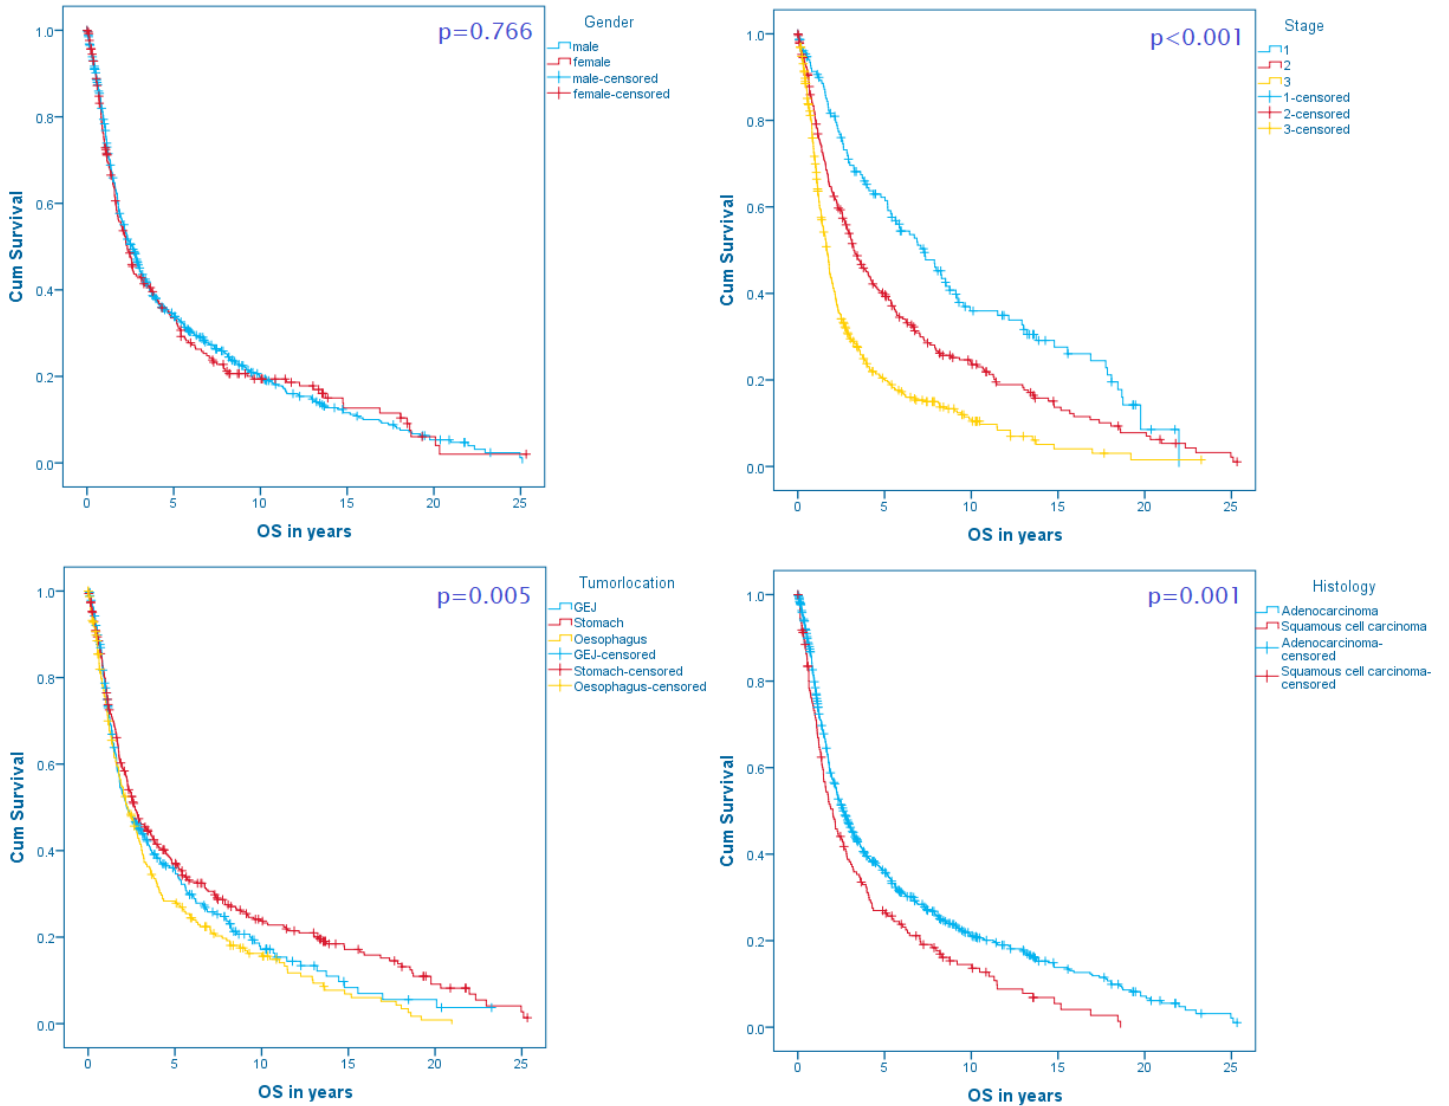

**Supplementary Figure S3: Boxplots of thyroid hormones in the overall cohort**

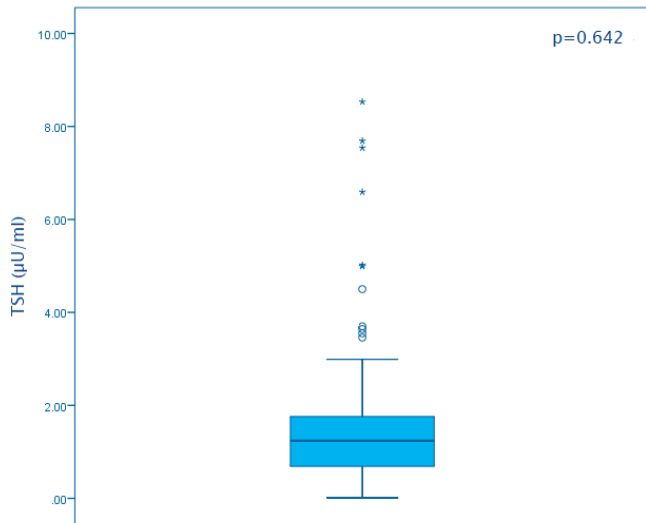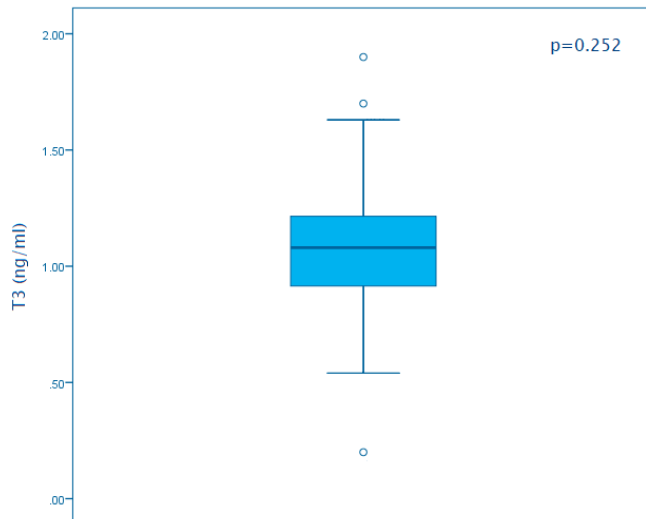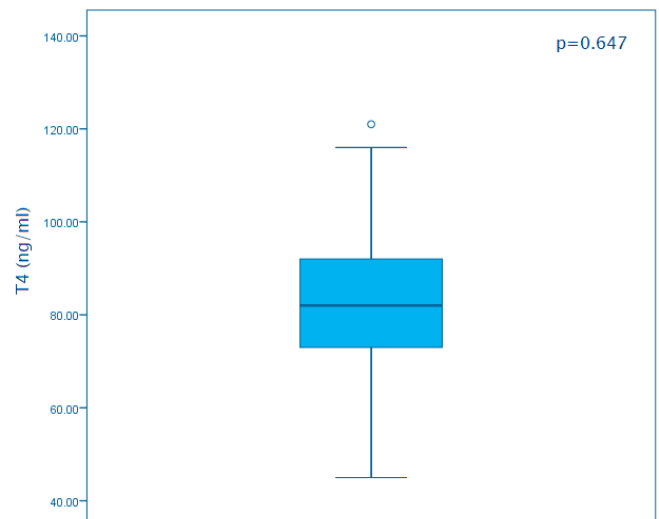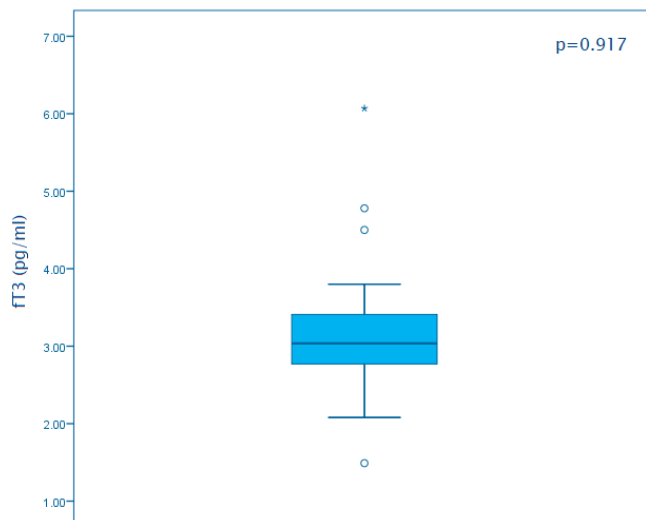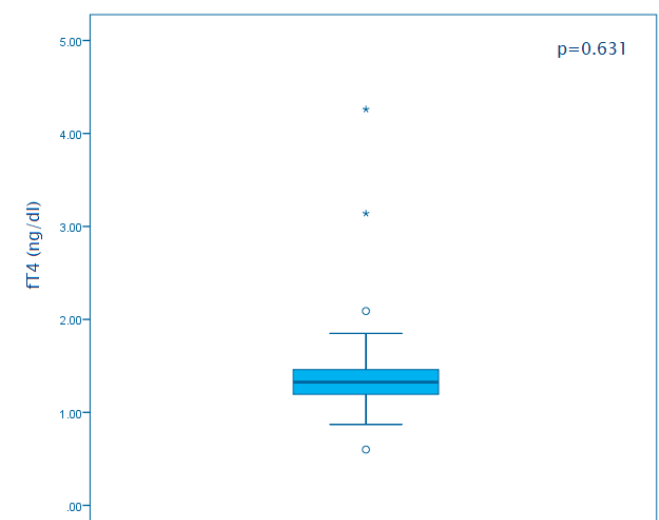

**Supplementary Figure S4: Clinical relevance of thyroid disorders**

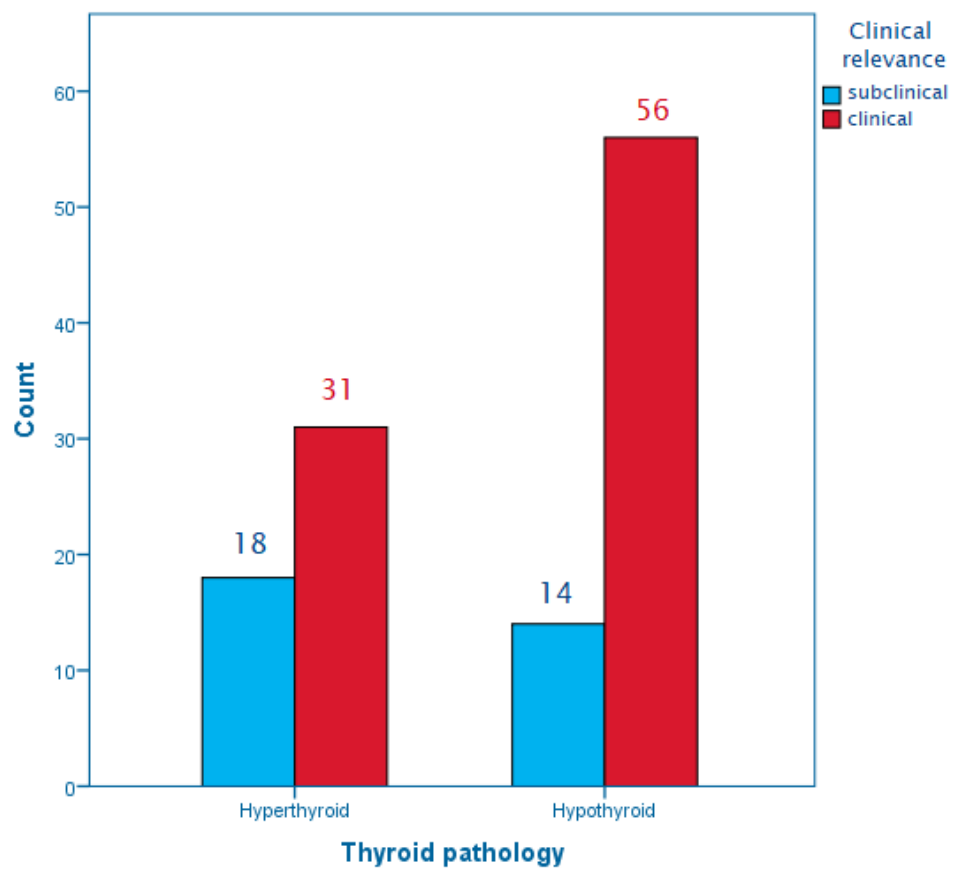

**Supplementary Figure S5:** Thyroid disorders regarding tumor stages.

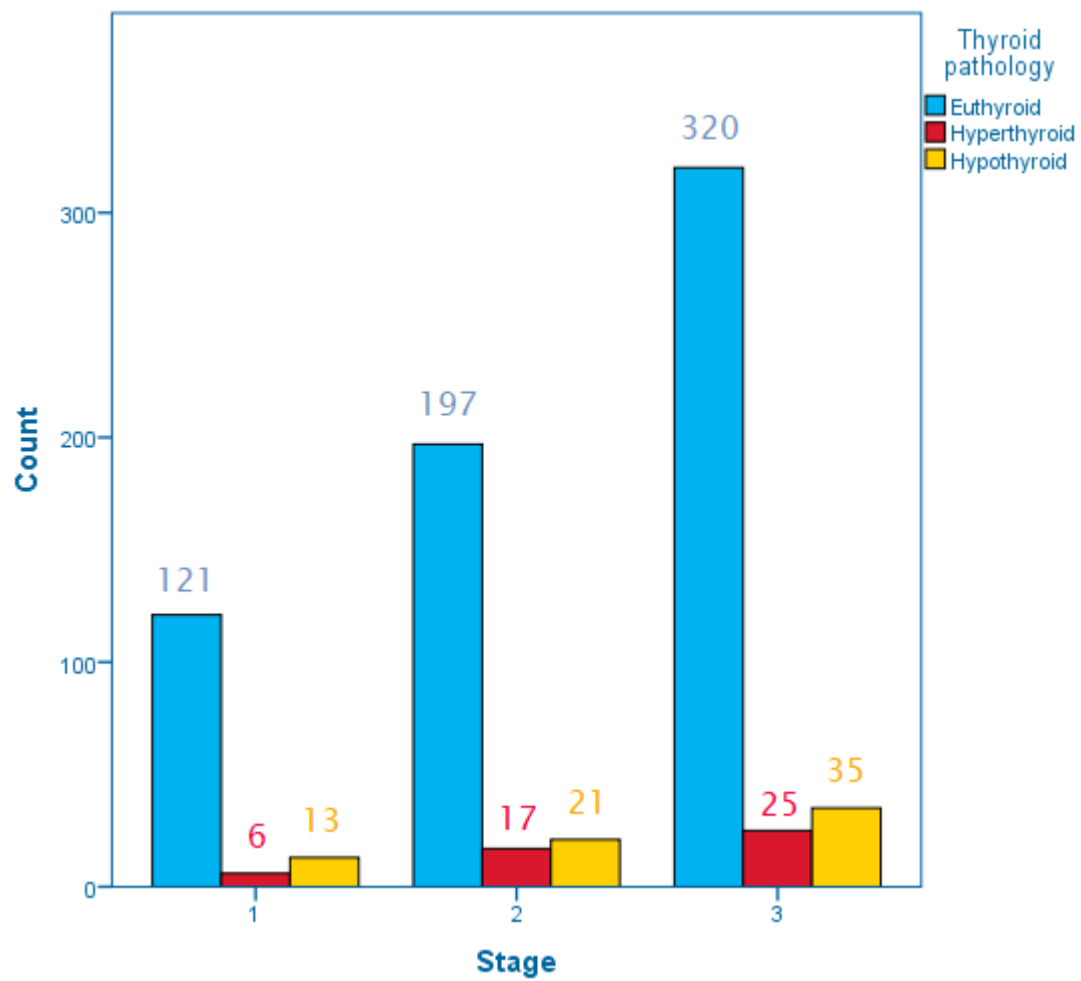

**Supplementary Table S1:** Missing endocrinological values

| Characteristic           | Data available | Data missing |
|--------------------------|----------------|--------------|
| <b>TSH</b> (μU/ml)       |                |              |
| n (%)                    | 209 (24.2%)    | 656 (75.9%)  |
| <b>T3</b> (ng/ml)        |                |              |
| n (%)                    | 60 (6.9%)      | 805 (93.1%)  |
| <b>T4</b> (ng/ml)        |                |              |
| n (%)                    | 89 (10.3%)     | 776 (89.7%)  |
| <b>fT3</b> (pg/ml)       |                |              |
| n (%)                    | 38 (4.4%)      | 827 (95.6%)  |
| <b>fT4</b> (ng/dl)       |                |              |
| n (%)                    | 80 (9.2%)      | 785 (90.8%)  |
| <b>Thyroid pathology</b> |                |              |
| n (%)                    | 767 (88.7%)    | 98 (11.3%)   |
